# Supplementary material for: Robust superomniphobic surfaces with mushroom-like micropillar arrays
Source: Royal Society of Chemistry journal article supplement (doi:10.1039/c2sm25879j), 2012-01-01
Supplement: c2sm25879j.pdf [file c2sm25879j.pdf]

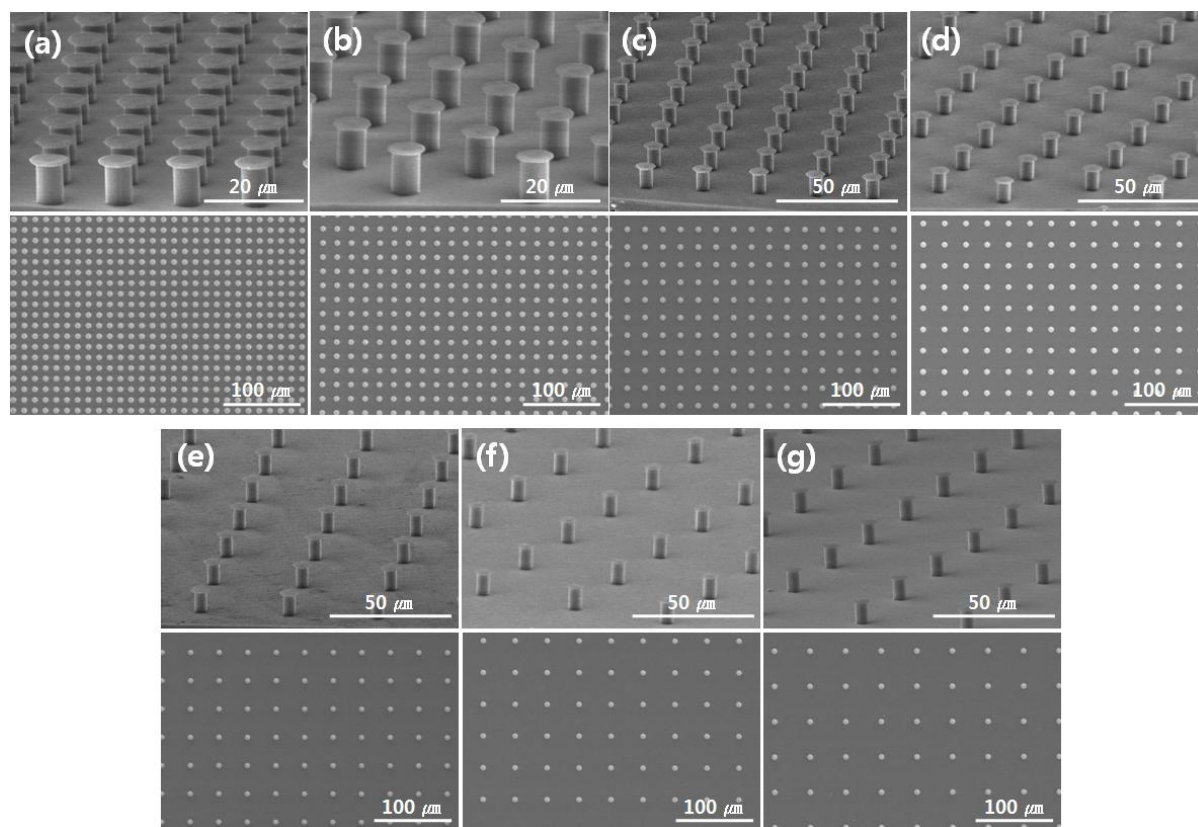

**Figure S1.** Additional SEM images of the fabricated PDMS micropillars with side (upper panels) and top views (lower panels). The micropillars, formed in square lattice, have 5- $\mu\text{m}$  diameter, 10- $\mu\text{m}$  height with different SRs: From (a) to (g),  $\text{SR} = 2, 3, 4, 5, 7, 8,$  and  $9,$  respectively..

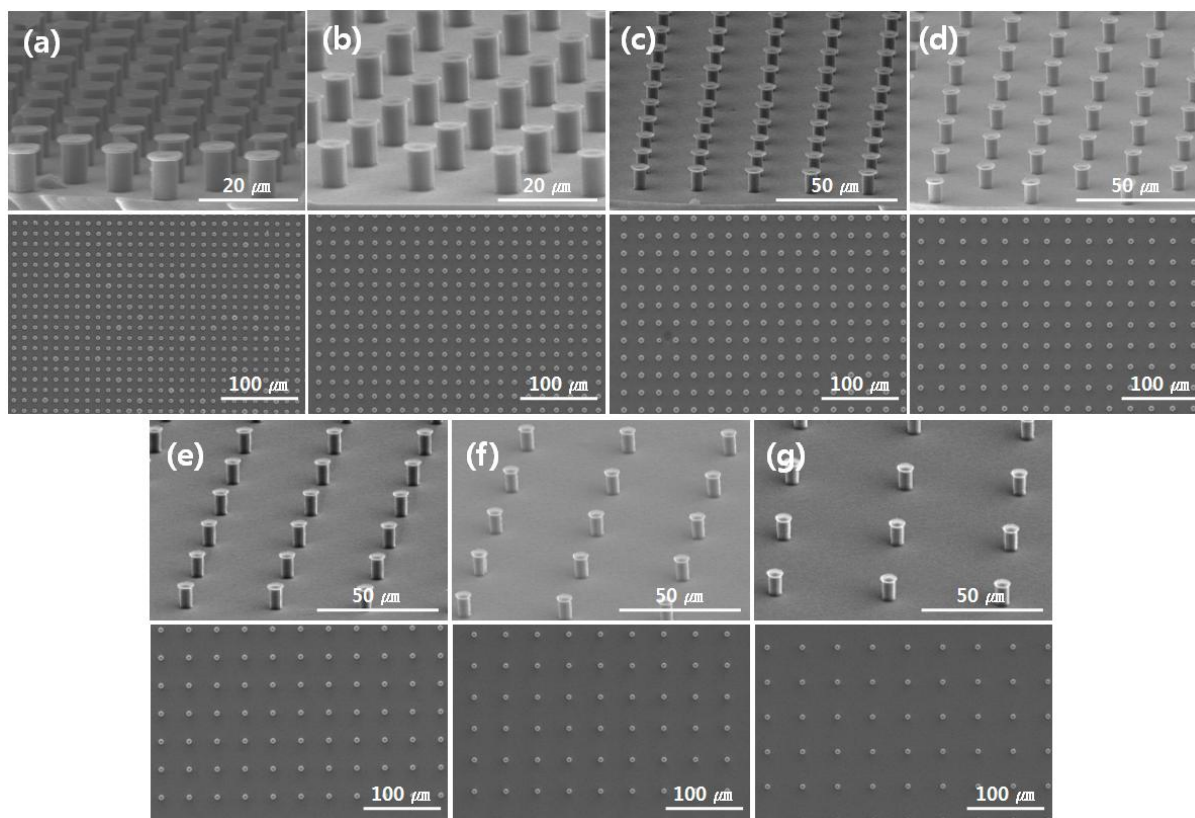

**Figure S2.** Additional SEM images of the fabricated PFPE micropillars with side (upper panels) and top views (lower panels). The micropillars, formed in square lattice, have 5- $\mu\text{m}$  diameter, 10- $\mu\text{m}$  height with different SRs: From (a) to (g),  $\text{SR} = 2, 3, 4, 5, 7, 8,$  and  $9,$  respectively.

## PDMS - Spacing Ratio 6

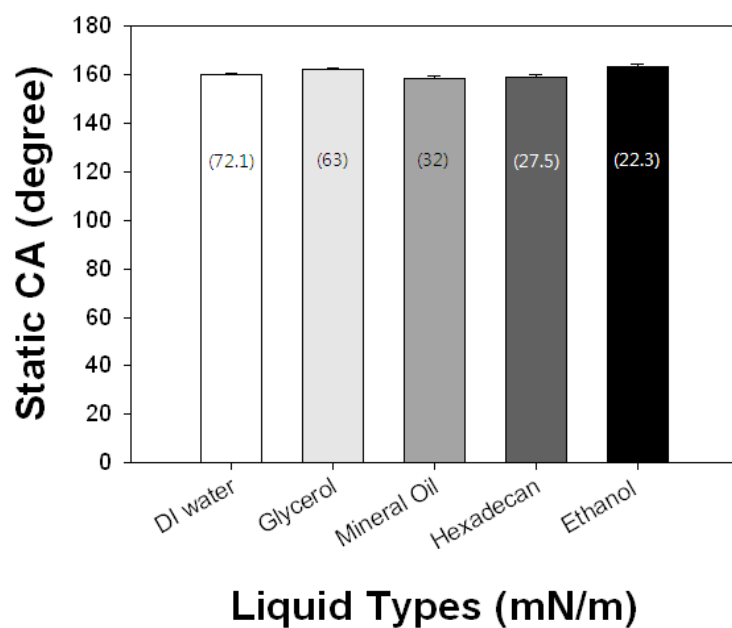

**Figure S3.** Static CAs of various liquids on PDMS micropillar arrays (SR = 6). The numbers within the bars indicate surface tension of each liquid. These micropillars show an optimal property for designing superomniphobic surfaces in our experiment.

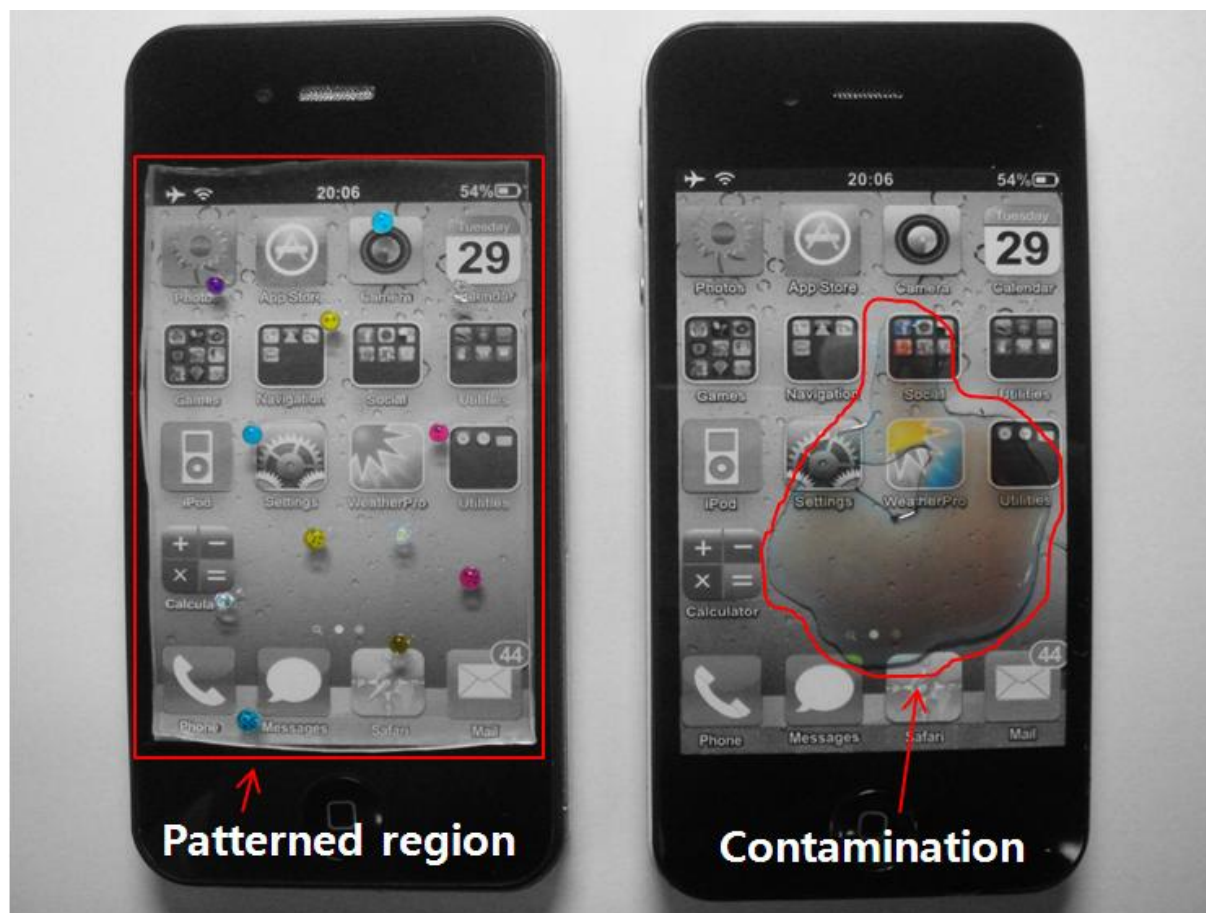

**Figure S4.** Demonstration of superomniphobic surfaces on touch-phone screens. The left figure shows that the superoleophobic surface (PDMS micropillar arrays,  $SR = 6$ ) is not contaminated by various liquids: DI water (transparent), mineral oil (blue), hexadecane (red) and ethanol (yellow). In contrast, the unmodified surface on the right is immediately wetted by the liquids upon contact.

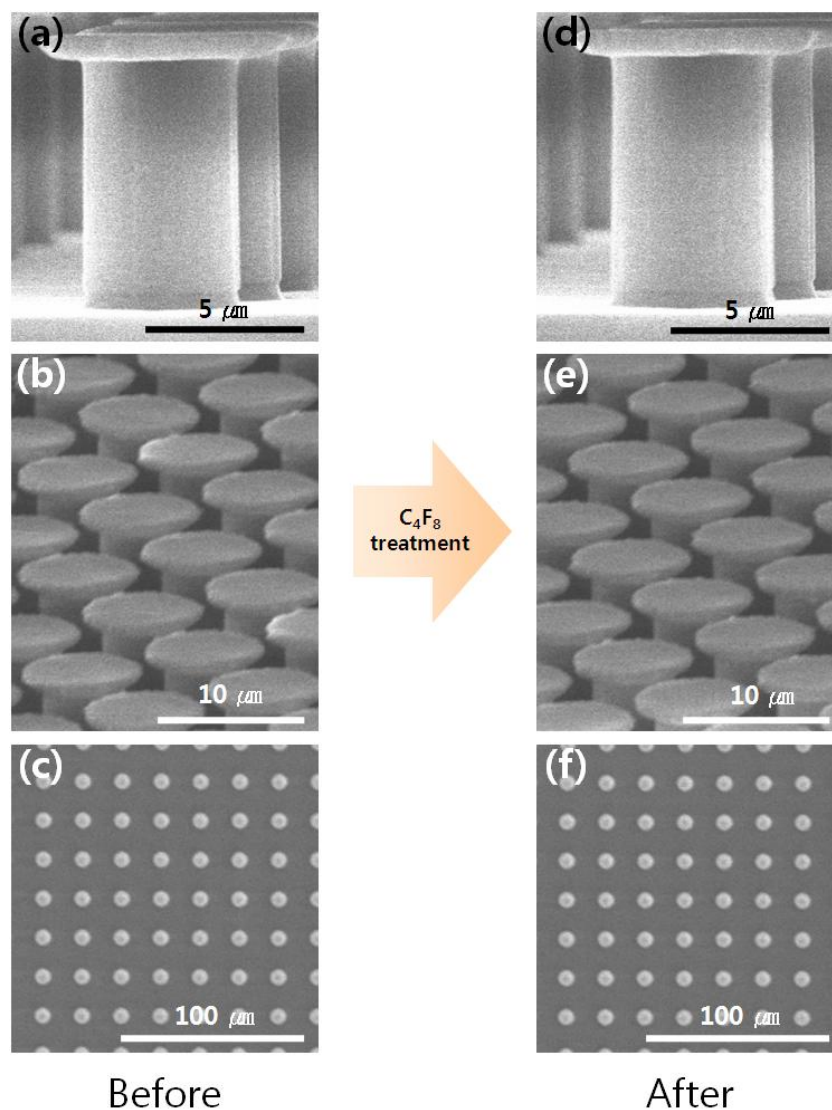

Figure S5. Surface modification results by  $C_4F_8$  treatment. No significant differences were observed between non- $C_4F_8$  treatment PDMS surface (a-c) and the same surface with  $C_4F_8$  treatment (d-f). As shown, the deposited layer of fluorocarbon compounds was thin ( $\sim 50$  nm) and uniformly coated.

## PDMS - Ethanol

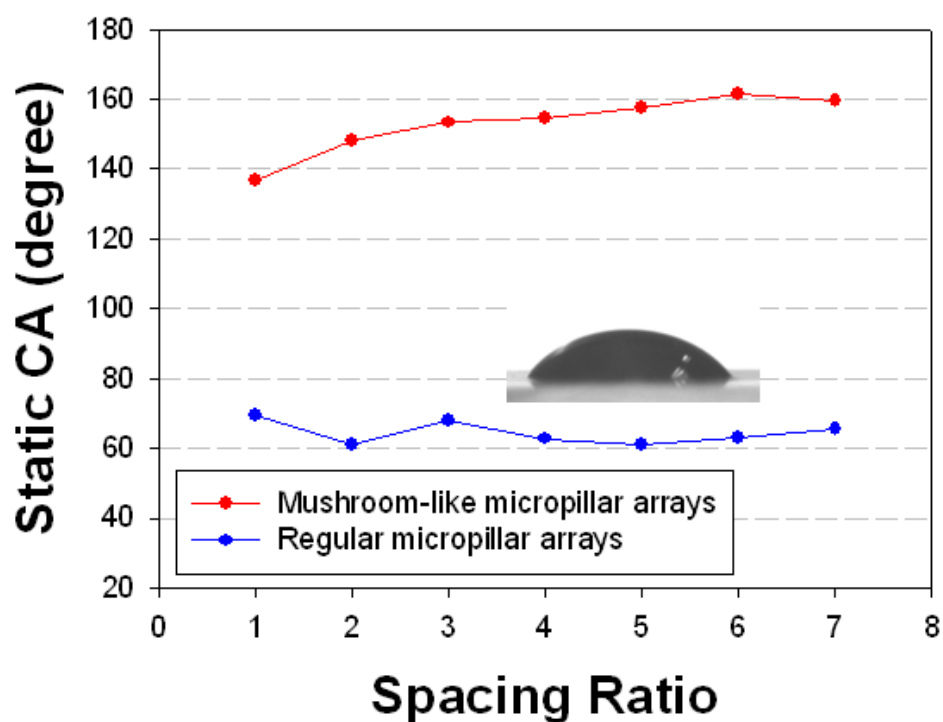

Figure S6. Change of static CAs with two types of PDMS micropillar arrays as a function of SR: Red line represents mushroom-like micropillar arrays with ethanol for  $SR < 8$ , showing superomniphobic properties (see Figure 2(c)). Blue line is for regular micropillar arrays having  $5\text{-}\mu\text{m}$  pillar diameter and  $10\text{-}\mu\text{m}$  height. The inset photograph shows the wetting shape of ethanol on the surface.
